# Supplementary material
Source: Preprints.org preprint supplement (doi:10.20944/preprints202012.0247.v1)
Supplement: Supplementary file 1 [file supplementary]

Legend for Supplementary Figure 1.

**Suppl. Fig. 1. Comparison of electroporation and coincubation EV protocol on rCSC apoptosis and miR transfer**. A: Percentage of apoptotic rCSCs treated with naïve HLSC-EVs (EV), or with HLSC-EVs either electroporated (EV-elettr) or coincubated (EV-coinc) with a scrambled sequence. Results are mean ± SD of three independent experiments. A-Nova was performed: *=p<0.05 vs untreated rCSCs (CTL). B: Real time analysis of miR-200a and miR-200b levels in rCSCs treated for 24h with naïve HLSC-EVs (EV), or with HLSC-EVs either electroporated (EV-elettr), or coincubated (EV-coinc) with a scrambled sequence. Data are expressed as Relative Quantification (RQ) normalized to untreated cells (CTL) and to RNU6B.
